# Oocyte cryopreservation: where are we now?

Catrin E. Argyle<sup>1</sup>, Joyce C. Harper<sup>2,\*</sup>, and Melanie C. Davies<sup>3</sup>

<sup>1</sup>Institute for Women's Health, University College London, London, UK <sup>2</sup>Embryology, IVF and Reproductive Genetics Group, Institute for Women's Health, University College London, London, UK <sup>3</sup>University College London Hospitals NHS Foundation Trust, London, UK

\*Correspondence address. E-mail: joyce.harper@ucl.ac.uk

Submitted on November 26, 2015; resubmitted on February 10, 2016; accepted on February 15, 2016

---

## TABLE OF CONTENTS

---

- Introduction
  - Methods
  - A history of oocyte cryopreservation
  - Cryopreservation techniques
  - Open versus closed vitrification
  - The trend towards vitrification
  - Outcomes of oocyte cryopreservation
  - Clinical applications of oocyte cryopreservation
  - Oocyte versus embryo cryopreservation
  - Oocyte donation
  - Fertility preservation in cancer patients
  - Elective oocyte cryopreservation
  - Age-related fertility decline
  - The rise of 'social' oocyte cryopreservation: social and ethical implications
  - Attitudes surrounding 'social' oocyte cryopreservation
  - Follow-up of 'social-freezers'
  - Other indications
  - Where are we now?
- 

**INTRODUCTION:** Since the first live birth from oocyte cryopreservation three decades ago, oocyte cryopreservation has become an important component of ART. Cryopreservation techniques have evolved, leading to higher success rates and the introduction of oocyte cryopreservation into IVF clinics worldwide. Concurrently, there has been an increase in patient demand, especially for so-called 'social egg freezing' that allows women to preserve their fertility in anticipation of age-related fertility decline. This review addresses a need to evaluate the current status of oocyte cryopreservation. It explores current techniques and success rates, clinical applications, the rise of elective oocyte cryopreservation, and future implications.

**METHODS:** A search was performed using Web of Science and PubMed databases for publications between January 1980 and December 2015. Keywords used included 'egg freezing', 'oocyte freezing', 'oocyte cryopreservation', 'oocyte vitrification', and 'fertility preservation'.

**RESULTS:** The success rate of oocyte cryopreservation has risen, and the increasing use of vitrification offers has improved outcomes, with IVF pregnancy rates now similar to those achieved with fresh oocytes. There are conflicting opinions about the comparative success rates of open and closed vitrification. Patients are accessing and receiving oocyte cryopreservation for a wide range of indications, and there has been a marked increase in patient numbers and oocyte cryopreservation cycles. Oocyte cryopreservation for circumventing age-related infertility is becoming more widely accepted.

**CONCLUSION:** Oocyte cryopreservation is an established component of ART, with vitrification now being the cryopreservation technique of choice. Increasing numbers of women undergo oocyte cryopreservation for both medical and social reasons. It is important to continue auditing outcomes and reporting long-term follow-up of children born from frozen–thawed oocytes.

**Key words:** oocyte cryopreservation / oocyte vitrification / fertility preservation / egg freezing / ART

## Introduction

The scope of assisted reproductive technology (ART) has widened greatly since the birth of Louise Brown in 1978 (Stephoe and Edwards, 1978). Both embryo and sperm cryopreservation are well-established procedures, but it was not until relatively recently that oocyte cryopreservation has become available as an additional fertility preservation option for women. Significantly, oocyte cryopreservation challenges the ethical, legal and religious concerns surrounding embryo cryopreservation, making it preferable in many situations.

Since the first birth from a frozen oocyte was achieved in Australia in 1986 (Chen, 1986), many advances have been made in the field. Research has been accelerated because of legal restrictions and ethical concerns relating to embryo storage. Now, improved techniques and success rates have led to the application of oocyte cryopreservation for many different indications, including age-related fertility decline.

## Methods

This literature review will discuss the current status of oocyte cryopreservation, considering its history, clinical indications, and the efficacy of techniques. Web of Science and PubMed databases were used to search for relevant publications between January 1980 and December 2015. Keywords used included 'egg freezing', 'oocyte freezing', 'oocyte cryopreservation', 'oocyte vitrification', and 'fertility preservation'.

## A history of oocyte cryopreservation

Successful pregnancies from frozen oocytes were first achieved in the late 1980s, using slow-freeze and rapid-thaw cryopreservation techniques (Chen, 1986, 1988; Van Uem et al., 1987). However, there was a lack of progress in the field owing to technical concerns and low success rates (Bernard and Fuller, 1996). Oocytes are notoriously difficult cells to cryopreserve, due to their low surface area to volume ratio and high susceptibility to intracellular ice formation (Paynter et al., 1999). Early papers highlighted difficulties in predicting the membrane permeability characteristics of human oocytes along with other biophysical parameters (Fuller et al., 1992; Hunter et al., 1992a, b). Studies also revealed the negative effects of cryopreservation on the stability of microtubules and microfilaments in mammalian oocytes (Pickering and Johnson, 1987; Sathananthan et al., 1988; Vincent et al., 1989; Pickering et al., 1990; Joly et al., 1992), which are vital for normal chromosomal segregation (Glenister et al., 1987). Hardening of the zona pellucida, and subsequent low fertilization rates, were further difficulties associated with cryopreservation (Johnson et al., 1988; Vincent et al., 1990). Later papers produced more promising results, suggesting that human oocytes had the potential to retain their morphology and chromosomal integrity post cryopreservation (Gook et al., 1994; Van Blerkom and Davis, 1994). However, a reliable protocol for the clinical cryopreservation of oocytes was still lacking.

Research into oocyte cryopreservation was accelerated by legislative restrictions surrounding the storage of embryos, particularly those in Italy that prevented the cryopreservation of excess embryos (Benagiano and Gianaroli, 2004). The introduction of vitrification as an alternative to slow freezing reduced damage to internal structures and led to superior success rates (Antinori et al., 2007; Cao et al., 2009; Fadini et al., 2009; Smith et al., 2010). Further, the use of intracytoplasmic sperm injection (ICSI) as an insemination method for vitrified oocytes was found to rectify fertilization issues due to zona pellucida hardening (Kazem et al., 1995; Porcu et al., 1997; Fabbri et al., 1998).

The Human Fertilisation and Embryology Authority (HFEA) has allowed the use of frozen oocytes for infertility treatment in the UK since 2000 (Wise, 2000). HFEA regulations allow the storage of gametes for a standard 10-year period, which can be extended under certain circumstances (HFEA, 2015). In 2013, the American Society for Reproductive Medicine (ASRM) lifted the experimental label applied to oocyte freezing, following four randomized controlled trials (Cobo et al., 2008, 2010a, Rienzi et al., 2010; Parmegiani et al., 2011) that suggested that in-vitro fertilization (IVF) using vitrified/warmed oocytes could produce similar fertilization and pregnancy rates to IVF with fresh oocytes (ASRM, 2013). This has prompted the introduction of oocyte cryopreservation into a growing number of IVF clinics worldwide.

## Cryopreservation techniques

Cryopreservation involves the preservation of cells and tissues for extended periods of time at sub-zero temperatures. Cryoprotective additives (CPAs) are used in order to reduce cryodamage by preventing ice formation. They are classified into permeating or non-permeating CPAs, depending on their ability to cross the cell membrane. Various combinations of permeating (e.g. dimethyl sulfoxide (DMSO), glycerol, 1,2 propanediol (PrOH)) and non-permeating (e.g. sucrose, glucose, fructose, trehalose) CPAs can be used.

There are two basic techniques applied to the cryopreservation of human oocytes: controlled slow freezing, which was favoured in early protocols, and ultrarapid cooling by vitrification, which is now well-established. Slow freezing results in a liquid changing to a solid state whereas vitrification results in a non-crystalline amorphous solid.

During slow freezing, cells are exposed to a low concentration of CPAs and slow decreases in temperature. Oocytes are first cooled to a temperature of  $-5^{\circ}\text{C}$  to  $-7^{\circ}\text{C}$ , at which equilibration and seeding take place. Oocytes are then cooled at a slow rate of  $0.3\text{--}0.5^{\circ}\text{C}/\text{minute}$ , until a temperature of between  $-30^{\circ}\text{C}$  and  $-65^{\circ}\text{C}$  has been reached, before being added to liquid nitrogen for storage (Saragusty and Arav, 2011). Multiple studies have demonstrated success using slow freeze techniques to cryopreserve oocytes (Porcu et al., 1997; Tucker et al., 1998; Fabbri et al., 2001; Winslow et al., 2001; Boldt et al., 2003; Borini et al., 2004; Bianchi et al., 2007; Grifo and Noyes, 2010). Although various alterations to slow freeze protocols (e.g. Boldt et al., 2006; Borini

*et al.*, 2006) have contributed to higher success rates, there are still concerns surrounding the clinical efficiency of this technique. Comparisons between success rates using slow frozen and fresh human oocytes have suggested poorer outcomes with frozen/thawed oocytes (Levi Setti *et al.*, 2006; Borini *et al.*, 2010; Magli *et al.*, 2010).

Vitrification requires higher concentrations of CPAs, lowering the risk of ice nucleation and crystallization, and cooling rates of 100s to 10 000°C per minute before submersion into liquid nitrogen (Saragusty and Arav, 2011). The first live birth following vitrification was achieved in 1999 (Kuleshova *et al.*, 1999), whilst Kuwayama *et al.* developed the widely used 'Cryotop' vitrification method in 2005 (Kuwayama *et al.*, 2005).

There are two main classes of vitrification protocol: open and closed vitrification. Open vitrification involves direct contact between oocytes and liquid nitrogen, using low volume devices such as capillary glasses, cooper devices, pulled straws, and loops (Glujovsky *et al.*, 2014). In contrast, closed vitrification involves indirect contact between oocytes and liquid nitrogen using tubing systems (Glujovsky *et al.*, 2014).

## Open versus closed vitrification

The randomized controlled trials supporting similar success rates between IVF with vitrified/warmed oocytes and IVF with fresh oocytes (Cobo *et al.*, 2008, 2010a; Rienzi *et al.*, 2010; Parmegiani *et al.*, 2011) have all used open vitrification systems. Despite their proven proficiency, concerns have been raised over the sterility of open systems due to potential cross-contamination between the vitrification sample and liquid nitrogen. Accordingly, studies have highlighted the potential of liquid nitrogen sterilization using ultraviolet light (Parmegiani *et al.*, 2010) or oocyte storage in vapour phase liquid nitrogen, which contains a lower density of environmental airborne contaminants (Cobo *et al.*, 2010b).

The introduction of closed vitrification has offered a solution to contamination concerns (Vajta *et al.*, 2015). After exposure to contaminated liquid nitrogen, Criado *et al.* (2011) found that closed devices were bacteria free, whereas bacteria were present in 45% of open devices. However, the use of closed systems raises new concerns about the efficiency of oocyte vitrification, due to their decreased cooling rates. One study suggested that the use of closed vitrification might not preserve the oocyte ultrastructure as well as in open systems (Bonetti *et al.*, 2011). Another study, comparing an open and closed vitrification system, found reduced fertilization, cleavage, and clinical pregnancy rates in the latter (Paffoni *et al.*, 2011).

Contrarily, other studies have suggest that closed vitrification can lead to excellent clinical outcomes whilst also providing an aseptic environment (Smith *et al.*, 2010; Stoop *et al.*, 2012; Papatheodorou *et al.*, 2013). A cross-section of UK clinics in 2011 suggested that 75% used closed containers rather than open containers for vitrification (Brison *et al.*, 2012). Whichever vitrification protocol is favoured, it is important to consider the warming rate. Observations have indicated that the warming rate is, in fact, more important than the cooling rate for oocyte survival in vitrification protocols (Seki and Mazur, 2009; Leibo and Pool, 2011; Mazur and Seki, 2011). It has also been noted that optimal outcomes are more likely to be achieved if vitrification and warming are carried out in the same clinic or by matched protocols (Brison *et al.*, 2012).

## The trend towards vitrification

Studies in the past few years have suggested the superiority of vitrification compared to slow freeze protocols. In 2006, a meta-analysis of oocyte

cryopreservation implied that pregnancy rates with cryopreserved oocytes could be improved with the use of vitrification, although at this point few pregnancies had been recorded (Oktay *et al.*, 2006). Subsequently, comparisons of IVF outcomes from slow-frozen and vitrified oocytes have demonstrated that vitrification leads to better survival, fertilization, and pregnancy rates (Cao *et al.*, 2009; Fadini *et al.*, 2009; Smith *et al.*, 2010), although only Fadini *et al.* (2009) reported pregnancy rates that were significantly higher (18.2 versus 7.6%). Increasing evidence on the efficacy of IVF with vitrified oocytes has suggested that it could achieve similar outcomes to IVF using fresh oocytes, with oocyte survival rates of over 84% (Nagy *et al.*, 2009; Almodin *et al.*, 2010; Ubaldi *et al.*, 2010; Rienzi *et al.*, 2012). Whereas in 1999, close to 100 cryopreserved oocytes were needed to achieve one pregnancy (Porcu *et al.*, 1999), now only 20 vitrified oocytes are required (Donnez and Dolmans, 2013), although this is highly dependent on the age of the oocyte (Cobo *et al.*, 2015a, b). Randomized controlled trials have produced clinical pregnancy rates (CPRs) per transfer ranging between 35.5 and 65.2% (Cobo *et al.*, 2008, 2010a; Rienzi *et al.*, 2010; Parmegiani *et al.*, 2011). A recent meta-analysis of five studies found that the rates of fertilization, embryo cleavage, high quality embryos and ongoing pregnancy did not differ between vitrification and fresh oocyte groups (Cobo and Diaz, 2011).

Many IVF programmes now favour vitrification as a technique to cryopreserve oocytes (Rudick *et al.*, 2010; Brison *et al.*, 2012; Glujovsky *et al.*, 2014), and a 2013 update to the National Institute for Health and Care Excellence (NICE) guidelines states: 'In cryopreservation of oocytes and embryos, use vitrification instead of controlled-rate freezing if the necessary equipment and expertise is available' (NICE, 2013).

## Outcomes of oocyte cryopreservation

Studies have considered the longer term obstetric and perinatal outcomes associated with vitrification. An analysis of 165 pregnancies and 200 infants found that the mean birthweight and incidence of congenital abnormalities (2.5%) were similar in infants born following oocyte vitrification to those born from spontaneous conceptions or through regular IVF (Chian *et al.*, 2008). Another review of 936 infants, born following either slow freezing or vitrification of oocytes, also found a comparable incidence of congenital abnormalities (1.3%) (Noyes *et al.*, 2009). Cobo *et al.* (2014) have reported that vitrification does not increase adverse obstetric and perinatal outcomes. No long-term follow-up of these children has yet been published.

Despite the reassurances surrounding the efficacy and safety of oocyte cryopreservation, it is important to continue auditing the data whilst the number of cycles increases worldwide. Fresh concerns were highlighted in a recent review that compared outcomes of fresh and cryopreserved donation cycles in the USA in 2013. Live birth rates per recipient cycle were found to be significantly lower when cryopreserved oocytes were used (43.3 versus 49.6%) (Kushnir *et al.*, 2015). However, it must be emphasized that this study did not adjust for important confounding factors such as donor and recipient ages or cryopreservation protocols.

## Clinical applications of oocyte cryopreservation

Whilst the technique was initially reserved for women with medical indications who had no other fertility options (European Society of Human

Reproduction and Embryology (ESHRE) Task Force on Ethics and Law, 2004; ASRM, 2008), oocyte cryopreservation now plays a role in many different circumstances. Perhaps most notable is the introduction of 'social egg freezing', as a means to preserve fertility in anticipation of age-related fertility decline (Baldwin *et al.*, 2014; Stoop *et al.*, 2014). Other applications of oocyte cryopreservation include donation programmes and storage of 'spare' gametes during IVF.

In the UK, the HFEA reports that up to 2012, around 18 000 oocytes have been stored for the patients' own use, while 160 thawing/warming cycles have been performed, resulting in 20 live births. A large proportion of IVF centres worldwide offer 'social egg freezing'.

## Oocyte versus embryo cryopreservation

Embryo cryopreservation is an established ART technique with many advantages. The ability to store surplus embryos can reduce the number of embryos transferred during a fresh cycle and thus minimize the risk of multiple pregnancy, reduce the need for repeated stimulation cycles, and increase cumulative pregnancy rates. However, embryo cryopreservation is not an option for all couples, because of personal religious or moral objections, or restrictive legislation in certain countries. Decisions over the fate of stored embryos can also lead to major disagreements or legal disputes, particularly in the case of divorce or separation (Pennings, 2000; Lee *et al.*, 2006). Oocyte cryopreservation may be a feasible alternative to embryo cryopreservation for many couples undergoing IVF (ASRM and Society for Assisted Reproductive Technology, 2013). There tends to be less moral sensitivity surrounding the storage and fate of gametes, and since the genetic material originates from one individual, there are fewer issues surrounding ownership.

## Oocyte donation

Oocyte donation has become an integral part of ART. It was initially accepted in the treatment of women with premature ovarian insufficiency (Kawwass *et al.*, 2013). In recent years the demand for oocyte donation has increased, as it has become a treatment option for large numbers of women experiencing age-related infertility. Owing to the careful selection of young and healthy oocyte donors, pregnancy rates in donation cycles often surpass those achieved by conventional IVF (Sauer and Kavac, 2006). However, traditional fresh donation cycles present some difficulties (Cobo *et al.*, 2011). One is the requirement for menstrual cycle synchronization between donor and recipient, so that oocytes can be collected and transferred within a certain time frame. Another concern is the absence of proper quarantine measures which are adhered to during sperm donation, using semen cryostorage (Cobo *et al.*, 2011). As the demand for oocytes increases (Kawwass *et al.*, 2013), recipient waiting times also lengthen. This is not helped by the fact that in fresh donation cycles, all donor oocytes tend to be allocated to a single recipient (Cobo *et al.*, 2011).

The introduction of oocyte cryopreservation into donation programmes overcomes these challenges. It simplifies the logistics of ART cycles as there is no need for menstrual cycle synchronization between donor and recipient; it allows for the testing of donors for infectious diseases during quarantine; and it potentially reduces cost through the efficient allocation of oocytes from a pool of donors to many recipients

(Cobo *et al.*, 2011). Oocyte cryopreservation has also led to the development of donor oocyte banks, which allow recipients to review a list of donors, and minimize waiting times (Cobo *et al.*, 2011; Quaas *et al.*, 2013). As well as cryopreserved oocytes from individual donors, surplus oocytes from infertile couples may be cryopreserved and subsequently donated, which proves particularly significant in countries where embryo donation is not allowed (Li *et al.*, 2005).

A growing proportion of donor oocyte cycles now utilize cryopreserved oocytes (Kawwass *et al.*, 2013). As of 2013, according to a study in the USA, 3130 oocytes from 294 donors were in storage in commercial oocyte banks. Six out of seven oocyte banks were using vitrification rather than slow freezing and all were expanding their donor databases (Quaas *et al.*, 2013).

Oocyte donation programmes are particularly useful for auditing the success of oocyte cryopreservation. The potential utility of cryostoring oocytes for donation was demonstrated by preliminary results from a donor oocyte bank that used slow freezing, achieving a pregnancy rate of 50% per cycle (Akin *et al.*, 2007), and a case series of four donor-recipient cycles using slow freezing yielded a clinical pregnancy rate of 75% (Barritt *et al.*, 2007). Nagy *et al.* (2009) compared the outcomes of fresh and vitrified oocyte donation cycles using the same 20 donors; the cumulative pregnancy rates were 78 and 85% respectively. Oocyte donation cycles in paired patients receiving fresh or vitrified oocytes from the same donor have led to similar ongoing pregnancy rates per embryo transfer: fresh 43.9% versus vitrified 47.2% (Trokoudes *et al.*, 2011). Solé *et al.* (2013) found comparable live birth rates (fresh, 38.4% versus vitrified, 43.4%,  $P > 0.05$ ) in their study on sibling oocytes from 99 donors. A larger randomized study compared success rates in recipients of fresh and vitrified oocytes; each group comprised 300 couples (Cobo *et al.*, 2010a). Ongoing pregnancy rates were 41.7 and 43.7% in the fresh and vitrification groups, with an odds ratio of 0.921 (95% CI 0.667–1.274), showing no significant difference.

The largest reported series to date of oocyte recipients undergoing treatment using vitrified donor oocytes (3610 warming procedures) demonstrated an oocyte survival rate of 90%; it was not possible to develop a predictive model for oocyte survival. The reported clinical pregnancy rate of 48% represents an 'oocyte-to-baby' rate of 6.5% (Cobo *et al.*, 2015a).

In summary, comparisons of fresh and frozen cycles have demonstrated the efficacy of oocyte 'cryobanking'; satisfactory pregnancy rates are achieved, and oocyte donation programmes are increasingly relying on vitrified oocytes. Of course, new ethical concerns have been raised by the development of commercial oocyte banks and the ease with which oocytes can be shipped between countries with varying or inadequate regulation, (Quaas *et al.*, 2013). However, with careful management, oocyte banks may change the dynamic of oocyte donation for the better.

## Fertility preservation in cancer patients

Cancer treatment regimes can have a detrimental effect on female fertility, due to the removal of reproductive organs or the use of radiation therapy and cytotoxic agents. The extent of damage depends on follicular reserve, patient age, and the type and dose of treatment, with alkylating agents being particularly gonadotoxic (Knopman *et al.*, 2010b; Fleischer *et al.*, 2011).

Around 10% of cancers occur in women under the age of 45 (Donnez and Dolmans, 2013), and the demand for fertility preservation amongst these patients has increased with improving cancer survival rates (Fleischer et al., 2011; Noyes et al., 2011). Embryo cryopreservation has been an option for some time (Ethics Committee of the ASRM, 2005; Lobo, 2005; Lee et al., 2006; Kim, 2006), but has disadvantages as explained above, with the risk of dispute if couples separate. It is also not appropriate for single women or young patients without a stable partner (Noyes et al., 2011).

Advances in oocyte cryopreservation mean that it can now be offered routinely for fertility preservation. In a study of 108 breast cancer patients undergoing fertility preservation treatment between 2005 and 2010, 16.7% opted for oocyte cryopreservation (Kim et al., 2012). In another study, 71.6% of cancer patients enquiring about fertility preservation underwent oocyte cryopreservation (Garcia-Velasco et al., 2013). At present, there are few reports of cancer patients returning to use their oocytes, but successful live births have been achieved (Martinez et al., 2004; Kim et al., 2011b; Garcia-Velasco et al., 2013).

The disadvantage of cryopreserving mature, metaphase II (MII), oocytes in cancer patients is the need for ovarian stimulation. This can delay cancer treatment by several weeks, and may carry particular risk for those patients with a hormone receptive cancer (Kim et al., 2011a). These problems can be reduced by the introduction of 'anytime start' protocols (Cakmak et al., 2013), to reduce delay, and the use of anti-estrogens during stimulation for women with breast cancer (Reddy and Oktay, 2012). Alternatives include the cryopreservation of oocytes at the germinal vesicle (GV) stage (Toth et al., 1994) or retrieval of immature oocytes followed by in-vitro maturation (IVM) (Rao et al., 2004; Huang et al., 2008; Oktay et al., 2010), neither of which require ovarian stimulation.

An alternative to oocyte cryopreservation, which does not delay cancer treatment, is ovarian tissue banking. An ovarian cortical biopsy or oophorectomy is performed as a day-case surgical procedure, independent of the menstrual cycle. The disadvantages are that the patient must be fit for surgery, and that the tissue must subsequently be regrafted, with potential risk of reintroducing malignant cells (Hoekman et al., 2015). In-vitro maturation of oocytes from human ovarian tissue has not yet been achieved. To date, however, relatively few births have been reported after regrafting frozen ovarian tissue (Donnez and Dolmans, 2015). A combination of oocyte cryopreservation with ovarian tissue banking may be the most effective fertility preservation technique in cancer patients (Donnez and Dolmans, 2013).

Now that oocyte cryopreservation for oncology patients is available, it is crucial that women are referred quickly to fertility specialists in order to discuss their options and initiate treatment (Kim et al., 2011a). Lee et al. (2010) found that both fertility preservation cycles and chemotherapy could be started earlier in breast cancer patients referred before breast surgery. Additionally, 9 of 35 patients referred before surgery were able to undergo two fertility preservation cycles, compared to only 1 of 58 patients referred after surgery. Multiple cycles are advantageous as more oocytes (or embryos) can be cryopreserved, potentially leading to greater success rates. Papers which have assessed the characteristics of oncological patients receiving fertility counselling (Lee et al., 2011) and undergoing fertility preservation (Kim et al., 2012) have highlighted the need to improve overall patient access.

## Elective oocyte cryopreservation

In almost all countries, an increasing number of women are postponing motherhood, resulting in rising numbers experiencing childlessness which they had not necessarily intended (Kneale and Joshi, 2008). Now that the cryopreservation of oocytes for age-related fertility decline is considered acceptable (ESHRE Task Force on Ethics and Law, 2012), 'social egg freezing' has become a popular subject within the media, and demand for the procedure has increased rapidly (Garcia-Velasco et al., 2013). Although the procedure is relatively new, there is already a growing debate surrounding its use.

The use of younger oocytes can reduce the risk of fetal loss and aneuploidies associated with ageing oocytes (Goold and Savulescu, 2009). The use of cryopreserved, autologous oocytes also allows the mother to have a genetic relation to her child that could not be achieved through oocyte donation (Dondorp and De Wert, 2009; Goold and Savulescu, 2009), and will provide a higher chance of pregnancy than the use of standard IVF at an older age (Sauer et al., 1990). A recent report of the largest series to date, 1468 women undergoing elective oocyte cryopreservation for non-oncologic reasons, of whom 137 returned to use them, showed that pregnancy rates were age-dependent and the optimal number of stored MII oocytes was at least 8–10 (Cobo et al., 2015b).

## Age-related fertility decline

The fertility decline experienced by women, which accelerates after the age of 35, is a well-known phenomenon (Dunson et al., 2004; Sozou and Hartshorne, 2012). This decline is largely attributable to a decrease in follicular number and oocyte quality (Faddy et al., 1992). If older women do conceive, they are at a significantly higher risk of fetal chromosomal abnormalities (Hook, 1981) and fetal loss (Nybo Anderson et al., 2000). Reproductive potential can be extended by the use of donated oocytes from younger women (Sauer et al., 1990; Navot et al., 1991).

A recent study reviewed the relationship of age-related fertility decline and the chance of realizing a desired family size (Habbema et al., 2015). Using a computer simulation that took into account natural fertility rates and current IVF success rates, it was suggested that women should start trying to conceive at 35 for a 90% chance of a one-child family, and at 28 for a 90% chance of a three-child family. In the absence of IVF, these ages dropped to 32 and 23 respectively. Studies have highlighted that many women are unaware of the effect of age on fertility (Lampic et al., 2006; Hashiloni-Dolev et al., 2011; Daniluk et al., 2012), and are thus compromising their reproductive future.

Older women accessing ART experience lower success rates, and therefore often undergo multiple cycles when using their own oocytes (Leridon, 2004) before considering different options. With the use of donated oocytes, they can experience similar success rates to their younger counterparts (Sauer et al., 1990). However, offspring from oocyte donation are not genetically related, and the process can be psychologically, emotionally, and financially challenging. A recent survey of 183 women found that 15% would rather remain childless than embark on oocyte donation (Hodes-Wertz et al., 2013).

For those women who choose gamete donation, there may be further hurdles; there is a worldwide shortage of oocyte donors (Trokoudes et al., 2011). By electing to undergo oocyte cryopreservation in anticipation of age-related fertility decline, women can effectively become their own oocyte donor (Knopman et al., 2010a), avoiding the challenges described above.

## The rise of 'social' oocyte cryopreservation: social and ethical implications

Oocyte cryopreservation has been described as a 'breakthrough for reproductive autonomy' (Harwood, 2009) and an 'emancipation' for women (Homburg *et al.*, 2009). There is an obvious gender inequality in reproduction, since men are able to reproduce at much older ages than women (Dondorp and De Wert, 2009). However, there are various reasons for which women may wish to delay motherhood, for example to focus on their career, to find a suitable partner or because they simply do not feel 'ready' (Goold and Savulescu, 2009). Oocyte cryopreservation can give women the ability to make more reproductive choices; to decide when and with whom they wish to have children.

Many concerns have also been raised in response to oocyte cryopreservation. There are risks involved in the process of ovarian stimulation and oocyte retrieval themselves (Goold and Savulescu, 2009; Bayliss, 2015). Additionally, when older women come back to use oocytes, they are also more likely to experience pregnancy complications such as pre-eclampsia, hypertension and gestational diabetes and to be delivered by Caesarean section (Ziadeh and Yahaya, 2001; Joseph *et al.*, 2005). However, it has been highlighted that these risks are the same as those in older women using conventional IVF (Goold and Savulescu, 2009). Another concern is whether the availability of oocyte cryopreservation encourages women to become complacent about their declining fertility (Goold and Savulescu, 2009). It is paramount that women receive the correct information about oocyte cryopreservation and its success rates, and do not accept it as an 'insurance policy' as it is often portrayed (Lockwood, 2011). Further, the decision by companies such as Apple and Facebook to offer 'social egg freezing' to their employees, may lead to women feeling pressured to delay childbirth (Bayliss, 2015), undermining the concept of reproductive autonomy. Whilst it has been emphasized that oocyte cryopreservation should be providing women with a back-up for conception into their 40s (Dondorp and De Wert, 2009), there are concerns that women will delay motherhood until their late 50s or 60s.

There are also worries about the high cost of oocyte cryopreservation. A study by Hirshfeld-Cytron *et al.* (2012) determined that if women were to cryopreserve their oocytes at the age of 25 and return to them at 40, this would be a less cost-effective strategy than simply undertaking ART at the age of 40 if difficulties were found trying to conceive naturally. More recently, a study suggested that oocyte cryopreservation before the age of 38 reduces the cost of achieving a live birth aged 40 and beyond (Devine *et al.*, 2015). A similar study found that oocyte cryopreservation was a more cost-effective strategy than IVF (Van Loendersloot *et al.*, 2011). In a response to high costs and a shortage of oocyte donors, some clinics now provide a 'freeze and share' programme, whereby women can donate a proportion of their frozen oocytes in order to receive free or discounted treatment. It could be argued, however, that women should be encouraged to have children early, rather than to invest in an expensive technique with no guarantee of pregnancy.

## Attitudes surrounding 'social' oocyte cryopreservation

Although it is still unclear exactly how many women will access elective oocyte cryopreservation (Stoop *et al.*, 2014), there is increasing research

to indicate the perceptions of reproductive-age women. A survey of 1049 Belgian women found that 77.6% had been previously aware of the technique and 31.5% of women would potentially cryopreserve their oocytes (Stoop *et al.*, 2011). A smaller survey of 129 medical students in Singapore found that 36.4% of respondents had heard of the technique and 26.4% would consider it (Tan *et al.*, 2014). Hodes-Wertz *et al.* (2013) surveyed 183 patients who had undergone elective oocyte cryopreservation in the USA. The main reason stated for delaying childbirth (88%) was the lack of a partner. Interestingly, 84% of those surveyed were over the age of 35. This is significant, since age at time of oocyte cryopreservation is an important determinant of outcome. Of these women, 79% of the women wished that they had frozen their oocytes earlier and 83% of patients believed that the media had given them a false impression of the reproductive lifespan. Following oocyte cryopreservation, 53% of women stated that they felt more secure about their reproductive future (Hodes-Wertz *et al.*, 2013). In two further studies, women banking oocytes were of a similar age (means of 36.7 and 36.9 years) (Baldwin *et al.*, 2015; Stoop *et al.*, 2015). In one cohort of 65 women, 65% reported that they were motivated to cryopreserve their oocytes as an 'insurance' against future infertility, and 49% wanted more time to find a partner (Stoop *et al.*, 2015).

## Follow-up of 'social-freezers'

Information about the outcomes of elective oocyte cryopreservation is scarce, as there are few data about women returning to use them (Stoop *et al.*, 2014). In the survey by Hodes-Wertz *et al.* (2013), only 6% of women (11 respondents) had used their oocytes during the 6-year timeframe. Of these, three patients reported having subsequently achieved a pregnancy from a thaw cycle, whilst five were unsuccessful and three others failed to comment. Stoop *et al.* (2015) found that 50.8% of women who cryopreserved their oocytes anticipated using them at some point. Interestingly, when their relationship and reproductive choices following oocyte cryopreservation were compared with those who did not cryopreserve their oocytes, no significant differences were found. In a follow-up of 23 women who had cryopreserved their oocytes, two had returned to use them with one successful pregnancy (Baldwin *et al.*, 2015).

## Other indications

Alongside oocyte donation, fertility preservation for cancer patients and 'social egg freezing', there are a growing number of other indications for oocyte cryopreservation.

Oocyte cryopreservation can be an important fertility option for women with a range of medical conditions other than cancer (Donnez and Dolmans, 2013) for example, women with endometriosis who may experience reduced ovarian reserve post surgery (Elizur *et al.*, 2009), women with autoimmune diseases requiring gonadotoxic treatment (Elizur *et al.*, 2008), and women with genetic aberrations leading to subfertility or risk of early menopause (Goswami and Conway, 2005). Oocyte cryopreservation can also provide an option for fertility preservation in gender reassignment surgery.

In addition, now that assessment of ovarian reserve is widely available using biophysical (antral follicle count) and biochemical (Anti-Müllerian hormone, early follicular FSH) measures, many women who are asymptomatic are identified as being at risk of early menopause. Although

ovarian reserve measurement has not been shown to have predictive value for spontaneous pregnancy, it is a reasonable strategy for these women to consider elective oocyte cryopreservation.

Another useful application of oocyte cryopreservation arises in the situation where a male partner fails to produce a sperm sample on the day of oocyte retrieval for IVF (Emery et al., 2004). The efficacy of 'emergency' oocyte cryopreservation was demonstrated in cases during which sperm extraction from male partners with non-obstructive azoospermia had failed (Song et al., 2011). Following emergency vitrification, 15 couples chose to warm the oocytes and use donor sperm for insemination, resulting in a clinical pregnancy rate of 53.3%. Vitrification has also been proposed as an efficient strategy for managing low-responders, allowing the storage and accumulation of oocytes from multiple ovarian stimulation cycles before IVF and embryo transfer (Cobo et al., 2012).

## Where are we now?

Oocyte cryopreservation is now an established technology with a wide range of indications. As the number of oocyte cryopreservation cycles increases, there is a real need to monitor why it is being done, the techniques being used, and the success rates achieved. Ideally national and international registries should be established to monitor the process. The increase in patients and oocyte cryopreservation cycles should be an advantage for carrying out future research. This should include the long-term follow-up of children born following oocyte vitrification. As with all ART techniques, there are ethical questions that need to be considered, particularly in the case of 'social egg freezing'. Oocyte cryopreservation is an exciting technique that will prove beneficial to many patients in the future.

## Authors' roles

C.E.A.: preformed literature searches and drafted the manuscript. J.C.H.: initiated the review and contributed to the manuscript. M.C.D.: contributed to writing and reviewing of the manuscript.

## Funding

No external funding was received for the writing of this review.

## Conflict of interest

C.E.A.: none. J.C.H.: none. M.C.D.: consultancy work at the Centre for Reproductive and Genetic Health, London, UK which performs oocyte cryopreservation.

## References

Akin JW, Bell KA, Thomas D, Boldt J. Initial experience with a donor egg bank. *Fertil Steril* 2007;**88**:e1–e4.

Almodin CG, Minguetti-Camara VC, Paixao CL, Pereira PC. Embryo development and gestation using fresh and vitrified oocytes. *Hum Reprod* 2010;**25**:1192–1198.

American Society for Reproductive Medicine, Society for Assisted Reproductive Technology. Ovarian tissue and oocyte cryopreservation. *Fertil Steril* 2008;**90**:S241–S246.

American Society for Reproductive Medicine, Society for Assisted Reproductive Technology. Mature oocyte cryopreservation: a guideline. *Fertil Steril* 2013;**99**:37–43.

Antinori M, Licata E, Dani G, Cerusico F, Versaci C, Antinori S. Cryotop vitrification of human oocytes results in high survival rate and healthy deliveries. *Reprod Biomed Online* 2007;**14**:72–79.

Baldwin K, Culley L, Hudson N, Mitchell H. Reproductive technology and the life course: current debates and research in social egg freezing. *Hum Fertil* 2014;**17**:170–179.

Baldwin K, Culley L, Hudson N, Mitchell H, Lavery S. Oocyte cryopreservation for social reasons: demographic profile and disposal intentions of UK users. *Reprod Biomed Online* 2015;**31**:239–245.

Barritt J, Luna M, Duke M, Grunfeld L, Mukherjee T, Sandler B, Copperman AB. Report of four donor-recipient oocyte cryopreservation cycles resulting in high pregnancy and implantation rates. *Fertil Steril* 2007;**87**:e13–e17.

Bayliss F. Left out in the cold: arguments against non-medical oocyte cryopreservation. *J Obstet Gynaecol Can* 2015;**37**:64–67.

Benaglio G, Gianaroli L. The new Italian IVF legislation. *Reprod Biomed Online* 2004;**9**:117–125.

Bernard A, Fuller BJ. Cryopreservation of human oocytes: current problems and perspectives. *Hum Reprod* 1996;**2**:193–207.

Bianchi V, Coticchio G, Distratis V, Di Giusto N, Flamigni C, Borini A. Differential sucrose concentration during dehydration (0.2 mol/l) and rehydration (0.3 mol/l) increases the implantation rate of frozen human oocytes. *Reprod Biomed Online* 2007;**14**:64–71.

Boldt J, Cline D, McLaughlin D. Human oocyte cryopreservation as an adjunct to IVF–embryo transfer cycles. *Hum Reprod* 2003;**18**:1250–1255.

Boldt J, Tidswell N, Sayers A, Kilani R, Cline D. Human oocyte cryopreservation: 5-year experience with a sodium-depleted slow freezing method. *Reprod Biomed Online* 2006;**13**:96–100.

Bonetti A, Cervi M, Tomei F, Marchini M, Ortolani F, Manno M. Ultrastructural evaluation of human metaphase II oocytes after vitrification: closed versus open devices. *Fertil Steril* 2011;**95**:928–935.

Borini A, Bonu MA, Coticchio G, Bianchi V, Cattoli M, Flamigni C. Pregnancies and births after oocyte cryopreservation. *Fertil Steril* 2004;**82**:601–605.

Borini A, Sciajno R, Bianchi V, Sereni E, Flamigni C, Coticchio G. Clinical outcome of oocyte cryopreservation after slow cooling with a protocol utilizing a high sucrose concentration. *Hum Reprod* 2006;**21**:512–517.

Borini A, Levi Setti PE, Anserini P, De Luca R, De Santis L, Porcu E, La Sala GB, Ferraretti A, Bartolotti T, Coticchio G et al. Multicenter observational study on slow-cooling oocyte cryopreservation: clinical outcome. *Fertil Steril* 2010;**94**:1662–1668.

Brisson D, Cutting R, Clarke H, Wood M. ACE consensus meeting report: oocyte and embryo cryopreservation Sheffield 17.05.11. *Hum Fertil* 2012;**15**:69–74.

Cakmak H, Katz A, Cedars MI, Rosen MP. Effective method for emergency fertility preservation: random-start controlled ovarian stimulation. *Fertil Steril* 2013;**100**:1673–1680.

Cao Y, Xing Q, Li L, Cong L, Zhang Z, Wei Z, Zhou P. Comparison of survival and embryonic development in human oocytes cryopreserved by slow-freezing and vitrification. *Fertil Steril* 2009;**92**:1306–1311.

Chen C. Pregnancy after human oocyte cryopreservation. *Lancet* 1986;**1**:884–886.

Chen C. Pregnancies after human oocyte cryopreservation. *Ann N Y Acad Sci* 1988;**541**:541–549.

Chian R, Huang JY, Tan SL, Lucena E, Saa A, Rojas A, Castellón LAR, Amador MIG, Sarmiento JEM. Obstetric and perinatal outcome in 200 infants conceived from vitrified oocytes. *Reprod Biomed Online* 2008;**16**:608–610.

Cobo A, Diaz C. Clinical application of oocyte vitrification: a systematic review and meta-analysis of randomized controlled trials. *Fertil Steril* 2011;**96**:277–285.

Cobo A, Kuwayama M, Pérez S, Ruiz A, Pellicer A, Remohí J. Comparison of concomitant outcome achieved with fresh and cryopreserved donor oocytes vitrified by the Cryotop method. *Fertil Steril* 2008;**89**:1657–1664.

Cobo A, Meseguer M, Remohí J, Pellicer A. Use of cryo-banked oocytes in an ovum donation programme: a prospective, randomized, controlled, clinical trial. *Hum Reprod* 2010a;**25**:2239–2246.

Cobo A, Romero JLL, Pérez S, De Los Santos MJ, Meseguer M, Remohí J. Storage of human oocytes in the vapor phase of nitrogen. *Fertil Steril* 2010b;**94**:1903–1907.

Cobo A, Remohí J, Chang C, Nagy ZP. Oocyte cryopreservation for donor egg banking. *Reprod Biomed Online* 2011;**23**:341–346.

Cobo A, Garrido N, Crespo J, José R, Pellicer A. Accumulation of oocytes: a new strategy for managing low-responder patients. *Reprod Biomed Online* 2012;**24**:424–432.

Cobo A, Serra V, Garrido N, Olmo I, Pellicer A, Remohí J. Obstetric and perinatal outcome of babies born from vitrified oocytes. *Fertil Steril* 2014;**102**:1006–1015.e4.

- Cobo A, Garrido N, Pellicer A, Remohí J. Six years' experience in ovum donation using vitrified oocytes: report of cumulative outcomes, impact of storage time, and development of a predictive model for oocyte survival rate. *Fertil Steril* 2015b; **104**:1426–1434.e8.
- Cobo A, García-Velasco JA, Coello A, Domingo J, Pellicer A, Remohí J. Oocytes vitrification as an efficient option for elective fertility preservation. *Fertil Steril* 2015b; **105**:755–764.e8.
- Criado E, Moalli F, Polentarutti N, Albani E, Morreale G, Menduni F, Levi-Setti PE. Experimental contamination assessment of a novel closed ultravitrification device. *Fertil Steril* 2011; **95**:1777–1779.
- Daniluk JC, Koert E, Cheung A. Childless women's knowledge of fertility and assisted human reproduction: identifying the gaps. *Fertil Steril* 2012; **97**:420–426.
- Devine K, Mumford SL, Goldman KN, Hodes-Wertz B, Druckenmiller S, Propst AM, Noyes N. Baby budgeting: oocyte cryopreservation in women delaying reproduction can reduce cost per live birth. *Fertil Steril* 2015; **103**:1446–1453.
- Dondorp WJ, De Wert GMWR. Fertility preservation for healthy women: ethical aspects. *Hum Reprod* 2009; **24**:1779–1785.
- Donnez J, Dolmans MM. Fertility preservation in women. *Nat Rev Endocrinol* 2013; **9**:735–749.
- Donnez J, Dolmans MM. Ovarian cortex transplantation: 60 reported live births brings the success and worldwide expansion of the technique towards routine clinical practice. *J Assist Reprod Genet* 2015; **32**:1167–1170.
- Dunson DB, Baird DD, Colombo B. Increased infertility with age in men and women. *Am J Obstet Gynecol* 2004; **103**:51–56.
- Elizur SE, Chian RC, Pineau CA, Son WY, Holzer HEG, Huang JY, Gidoni Y, Levin D, Demirtas E, Tan SL. Fertility preservation treatment for young women with autoimmune diseases facing treatment with gonadotoxic agents. *Rheumatology* 2008; **47**:1506–1509.
- Elizur SE, Chian R, Holzer HEG, Gidoni Y, Tulandi T, Tan SL. Cryopreservation of oocytes in a young woman with severe and symptomatic endometriosis: a new indication for fertility preservation. *Fertil Steril* 2009; **91**:e293.e1–e293.e3.
- Emery M, Senn A, Wisard M, Germond M. Ejaculation failure on the day of oocyte retrieval for IVF: Case report. *Hum Reprod* 2004; **19**:2088–2090.
- ESHRE Task Force on Ethics and Law. Ethical considerations for the cryopreservation of gametes and reproductive tissues for self use. *Hum Reprod* 2004; **19**:460–462.
- ESHRE Task Force on Ethics and Law. Oocyte cryopreservation for age-related fertility loss. *Hum Reprod* 2012; **27**:1231–1237.
- Ethics committee of the American Society for Reproductive Medicine. Fertility preservation and reproduction in cancer patients. *Fertil Steril* 2005; **83**:1622–1628.
- Fabbri R, Porcu E, Marsella T, Primavera MR, Seracchioli R, Ciotti PM, Magrini O, Venturoli S, Flamigni C. Oocyte cryopreservation. *Hum Reprod* 1998; **13**:98–108.
- Fabbri R, Porcu E, Marsella T, Rocchetta G, Venturoli S, Flamigni C. Human oocyte cryopreservation: new perspectives regarding oocyte survival. *Hum Reprod* 2001; **16**:411–416.
- Faddy MJ, Gosden RG, Gougeon A, Richardson SJ, Nelson JF. Accelerated disappearance of ovarian follicles in mid-life: implications for forecasting menopause. *Hum Reprod* 1992; **7**:1342–1346.
- Fadini R, Brambillasca F, Mignini Renzini M, Merola M, Comi R, De Ponti E, Dal Canto MB. Human oocyte cryopreservation: comparison between slow and ultrarapid methods. *Reprod Biomed Online* 2009; **19**:171–180.
- Fleischer RT, Vollenhoven BJ, Weston GC. The effects of chemotherapy and radiotherapy on fertility in premenopausal women. *Obstet Gynecol Surv* 2011; **66**:248–254.
- Freedom of Information Act. Chapter 36. 2000. <http://www.legislation.gov.uk/ukpga/2000/36> (30 August 2015, date last accessed).
- Fuller BJ, Hunter JE, Bernard AG, McGrath JJ, Curtis P, Jackson A. The permeability of unfertilised oocytes to 1,2-propanediol: a comparison of mouse and human cells. *Cryo Letters* 1992; **13**:287–292.
- García-Velasco JA, Domingo J, Cobo A, Martínez M, Carmona L, Pellicer A. Five years' experience using oocyte vitrification to preserve fertility for medical and nonmedical indications. *Fertil Steril* 2013; **99**:1994–1999.
- Glenister PH, Wood MJ, Kirby C, Whittingham DG. Incidence of chromosome anomalies in first-cleavage mouse embryos obtained from frozen-thawed oocytes fertilized in vitro. *Gamete Res* 1987; **16**:205–216.
- Glujovsky D, Riestra B, Sueldo C, Fiszbajn G, Repping S, Nodar F, Papier S, Ciapponi A. Vitrification versus slow freezing for women undergoing oocyte cryopreservation. *Cochrane Database Syst Rev* 2014. Issue 9. Art. No.: CD010047. doi:10.1002/14651858.CD010047.pub2.
- Gook DA, Osborn SM, Bourne H, Johnston WIH. Fertilization of human oocytes following cryopreservation; normal karyotypes and absence of stray chromosomes. *Hum Reprod* 1994; **9**:684–691.
- Goold I, Savulescu J. In favour of freezing eggs for non-medical reasons. *Bioethics* 2009; **23**:47–58.
- Goswami D, Conway GS. Premature ovarian failure. *Hum Reprod Update* 2005; **11**:391–410.
- Grifo JA, Noyes N. Delivery rate using cryopreserved oocytes is comparable to conventional in vitro fertilization using fresh oocytes: potential fertility preservation for female cancer patients. *Fertil Steril* 2010; **93**:391–396.
- Habbema JDF, Eijkemans MJC, Leridon H, Te Velde ER. Realizing a desired family size: when should couples start? *Hum Reprod* 2015; **30**:2215–2221.
- Harwood K. Egg freezing: a breakthrough for reproductive autonomy? *Bioethics* 2009; **23**:39–46.
- Hashiloni-Dolev Y, Kaplan A, Shkedi-Rafid S. The fertility myth: Israeli students' knowledge regarding age-related fertility decline and late pregnancies in an era of assisted reproduction technology. *Hum Reprod* 2011; **26**:3045–3053.
- Hirshfeld-Cytron J, Grobman WA, Milad MP. Fertility preservation for social indications: a cost-based decision analysis. *Fertil Steril* 2012; **97**:665–670.
- Hodes-Wertz B, Druckenmiller S, Smith M, Noyes N. What do reproductive-age women who undergo oocyte cryopreservation think about the process as a means to preserve fertility? *Fertil Steril* 2013; **100**:1343–1349.
- Hoekman EJ, Smit VT, Fleming TP, Louwe LA, Fleuren GJ, Hilders CG. Searching for metastases in ovarian tissue before autotransplantation: a tailor-made approach. *Fertil Steril* 2015; **103**:469–477.
- Homburg R, Van der Veen F, Silber SJ. Oocyte vitrification—Women's emancipation set in stone. *Fertil Steril* 2009; **91**:1319–1320.
- Hook EB. Rates of chromosome abnormalities at different maternal ages. *Obstet Gynecol* 1981; **58**:282–285.
- Huang JY, Tulandi T, Holzer H, Tan SL, Chian R. Combining ovarian tissue cryobanking with retrieval of immature oocytes followed by in vitro maturation and vitrification: an additional strategy of fertility preservation. *Fertil Steril* 2008; **89**:567–572.
- Human Fertilisation and Embryology Authority. *Code of Practice: 8th Edition*. 2015. [http://www.hfea.gov.uk/docs/HFEA\\_Code\\_of\\_Practice\\_8th\\_Edition\\_\(Apr\\_2015\).pdf](http://www.hfea.gov.uk/docs/HFEA_Code_of_Practice_8th_Edition_(Apr_2015).pdf) (7 September 2015, date last accessed).
- Hunter JE, Bernard A, Fuller BJ, McGrath JJ, Shaw RW. Measurements of the membrane water permeability (Lp) and its temperature dependence (activation energy) in human fresh and failed-to-fertilize oocytes and mouse oocytes. *Cryobiology* 1992a; **29**:240–249.
- Hunter JE, Bernard A, Fuller BJ, McGrath JJ, Shaw RW. Plasma membrane water permeabilities of human oocytes: the temperature dependence of water movement in individual cells. *J Cell Physiol* 1992b; **150**:175–179.
- Johnson MH, Pickering SJ, George MA. The influence of cooling on the properties of the zona pellucida of the mouse oocyte. *Hum Reprod* 1988; **3**:383–387.
- Joly C, Bchini O, Boulekbache H, Testart J, Maro B. Effects of 1,2-propanediol on the cytoskeletal organization of the mouse oocyte. *Hum Reprod* 1992; **7**:374–378.
- Joseph KS, Allen AC, Dodds L, Turner LA, Scott H, Liston R. The perinatal effects of delayed childbirth. *Obstet Gynecol* 2005; **105**:1410–1418.
- Kawwass JF, Monsour M, Crawford S, Kissin DM, Session DR, Kulkarni AD, Jamieson DJ. Trends and outcomes for donor oocyte cycles in the United States, 2000–2010. *JAMA* 2013; **310**:2426–2434.
- Kazem R, Thompson LA, Srikantharajah A, Laing MA, Hamilton MPR, Templeton A. Cryopreservation of human oocytes and fertilization by two techniques: in vitro fertilization and intracytoplasmic sperm injection. *Hum Reprod* 1995; **10**:2650–2654.
- Kim SS. Fertility preservation in female cancer patients: current developments and future directions. *Fertil Steril* 2006; **85**:1–11.
- Kim SS, Klemp J, Fabian C. Breast cancer and fertility preservation. *Fertil Steril* 2011a; **95**:1535–1543.
- Kim MK, Lee DR, Han JE, Kim YS, Lee WS, Won HJ, Kim JW, Yoon TK. Live birth with vitrified-warmed oocytes of a chronic myeloid leukemia patient nine years after allogeneic bone marrow transplantation. *J Assist Reprod Genet* 2011b; **28**:1167–1170.
- Kim J, Oktay K, Gracia C, Lee S, Morse C, Mersereau JE. Which patients pursue fertility preservation treatments? A multicenter analysis of the predictors of fertility preservation in women with breast cancer. *Fertil Steril* 2012; **97**:671–676.
- Kneale D, Joshi H. Postponement and childlessness: Evidence from two British cohorts. *Demogr Res* 2008; **19**:1935–1968.



- Knopman JM, Noyes N, Grifo JA. Cryopreserved oocytes can serve as the treatment for secondary infertility: a novel model for egg donation. *Fertil Steril* 2010a; **93**:2413.e7–2413.e9.
- Knopman JM, Papadopoulos EB, Grifo JA, Fino ME, Noyes N. Surviving childhood and reproductive-age malignancy: effects on fertility and future parenthood. *Lancet Oncol* 2010b; **11**:490–498.
- Kuleshova L, Gianaroli L, Magli C, Ferraretti A, Trounson A. Birth following vitrification of a small number of human oocytes. *Hum Reprod* 1999; **14**:3077–3079.
- Kushnir VA, Barad DH, Albertini DF, Darmon SK, Gleicher N. Outcomes of fresh and cryopreserved oocyte donation. *JAMA* 2015; **314**:623–624.
- Kuwayama M, Vajta G, Kato O, Leibo SP. Highly efficient vitrification method for cryopreservation of human oocytes. *Reprod Biomed Online* 2005; **11**:300–308.
- Lampic C, Skoog Svanberg A, Karlström P, Tydén T. Fertility awareness, intentions concerning childbearing, and attitudes towards parenthood among female and male academics. *Hum Reprod* 2006; **21**:558–564.
- Lee SJ, Schover LR, Partridge AH, Patrizio P, Wallace WH, Hagerty K, Beck LN, Brennan LV, Oktay K. American society of clinical oncology recommendations on fertility preservation in cancer patients. *J Clin Oncol* 2006; **24**:2917–2931.
- Lee S, Ozkavukcu S, Heytens E, Oktay K. Value of early referral to fertility preservation in young women with breast cancer. *J Clin Oncol* 2010; **28**:4683–4686.
- Lee S, Heytens E, Moy F, Ozkavukcu S, Oktay K. Determinants of access to fertility preservation in women with breast cancer. *Fertil Steril* 2011; **95**:1932–1936.
- Leibo SP, Pool TB. The principal variables of cryopreservation: solutions, temperatures, and rate changes. *Fertil Steril* 2011; **96**:269–276.
- Leridon H. Can assisted reproduction technology compensate for the natural decline in fertility with age? A model assessment. *Hum Reprod* 2004; **19**:1548–1553.
- Levi Setti PE, Albani E, Novara PV, Cesana A, Morreale G. Cryopreservation of supernumerary oocytes in IVF/ICSI cycles. *Hum Reprod* 2006; **21**:370–375.
- Li X, Chen S, Zhang X, Tang M, Kui Y, Wu X, Wang S, Guo Y. Cryopreserved oocytes of infertile couples undergoing assisted reproductive technology could be an important source of oocyte donation: a clinical report of successful pregnancies. *Hum Reprod* 2005; **20**:3390–3394.
- Lobo RA. Potential options for preservation of fertility in women. *N Engl J Med* 2005; **353**:64–73.
- Lockwood GM. Social egg freezing: the prospect of reproductive 'immortality' or a dangerous delusion? *Reprod Biomed Online* 2011; **23**:334–340.
- Magli MC, Lappi M, Ferraretti AP, Capoti A, Ruberti A, Gianaroli L. Impact of oocyte cryopreservation on embryo development. *Fertil Steril* 2010; **93**:510–516.
- Martinez M, Rabadan S, Domingo J, Cobo A, Pellicer A, Garcia-Velasco JA. Obstetric outcome after oocyte vitrification and warming for fertility preservation in women with cancer. *Reprod Biomed Online* 2014; **29**:722–728.
- Mazur P, Seki S. Survival of mouse oocytes after being cooled in a vitrification solution to  $-195^{\circ}\text{C}$  at  $95^{\circ}\text{C}$  to  $70,000^{\circ}\text{C}$  per min and warmed at  $610^{\circ}\text{C}$  to  $118,000^{\circ}\text{C}$  per min. A new paradigm for cryopreservation by vitrification. *Cryobiology* 2011; **62**:1–7.
- Nagy ZP, Chang C, Shapiro DB, Bernal DP, Elsner CW, Mitchell-Leef D, Toledo MD, Kort HI. Clinical evaluation of the efficiency of an oocyte donation program using egg cryo-banking. *Fertil Steril* 2009; **92**:520–526.
- National Institute for Health and Clinical Excellence (NICE). *Fertility: Assessment and Treatment for People with Fertility Problems*, CG156. London: National Institute for Health and Clinical Excellence, 2013.
- Navot D, Bergh PA, Williams MA, Garrisi GJ, Guzman I, Sandler B, Grunfeld L. Poor oocyte quality rather than implantation failure as a cause of age-related decline in female fertility. *Lancet* 1991; **337**:1375–1377.
- Noyes N, Porcu E, Borini A. Over 900 cryopreservation babies born with no apparent increase in congenital anomalies. *Reprod Biomed Online* 2009; **18**:769–776.
- Noyes N, Knopman JM, Melzer K, Fino ME, Friedman B, Westphal LM. Oocyte cryopreservation as a fertility preservation measure for cancer patients. *Reprod Biomed Online* 2011; **23**:323–333.
- Nybo Anderson A, Wohlfahrt J, Christens P, Olsen J, Melbye M. Maternal age and fetal loss: population based register linkage study. *BMJ* 2000; **320**:1708–1712.
- Oktay K, Cil AP, Bang H. Efficiency of oocyte cryopreservation: a metaanalysis. *Fertil Steril* 2006; **86**:70–80.
- Oktay K, Buyuk E, Rodriguez-Wallberg KA, Sahin G. In vitro maturation improves oocyte or embryo cryopreservation outcome in breast cancer patients undergoing ovarian stimulation for fertility preservation. *Reprod Biomed Online* 2010; **20**:634–638.
- Paffoni A, Guameri C, Ferrari S, Restelli L, Nicolosi AE, Scarduelli C, Ragni G. Effects of two vitrification protocols on the developmental potential of human mature oocytes. *Reprod Biomed Online* 2011; **22**:292–298.
- Papathodorou A, Vanderzwalmen P, Panagiotidis Y, Prapas N, Zikopoulos K, Georgiou I, Prapas Y. Open versus closed oocyte vitrification system: a prospective randomized sibling-oocyte study. *Reprod Biomed Online* 2013; **26**:595–602.
- Parmegiani L, Accorsi A, Cognigni GE, Bernardi S, Troilo E, Filicori M. Sterilization of liquid nitrogen with ultraviolet irradiation for safe vitrification of human oocytes or embryos. *Fertil Steril* 2010; **94**:1525–1528.
- Parmegiani L, Cognigni GE, Bernardi S, Cuomo S, Ciampaglia VV, Infante FE, Tabarelli de Fatis C, Arone A, Maccarini AM, Filicori M. Efficiency of aseptic open vitrification and hermetical cryostorage of human oocytes. *Reprod Biomed Online* 2011; **23**:505–512.
- Paynter SJ, Cooper A, Gregory L, Fuller BJ, Shaw RVW. Permeability characteristics of human oocytes in the presence of the cryoprotectant dimethylsulphoxide. *Hum Reprod* 1999; **14**:2338–2342.
- Pennings G. What are the ownership rights for gametes and embryos? *Hum Reprod* 2000; **15**:979–986.
- Pickering SJ, Johnson MH. The influence of cooling on the organization of the meiotic spindle of the mouse oocyte. *Hum Reprod* 1987; **2**:207–216.
- Pickering SJ, Braude PR, Johnson MH, Cant A, Currie J. Transient cooling to room-temperature can cause irreversible disruption of the meiotic spindle in the human oocyte. *Fertil Steril* 1990; **54**:102–108.
- Porcu E, Fabbri R, Seracchioli R, Ciotti PM, Magrini O, Flamigni C. Birth of a healthy female after intracytoplasmic sperm injection of cryopreserved human oocytes. *Fertil Steril* 1997; **68**:724–726.
- Porcu E, Fabbri R, Ciotti PM, Marsella T, Balicchia B, Damiano G, Caracciolo D, Giunchi D, De Cesare R, Flamigni C. Cycles of human oocyte cryopreservation and intracytoplasmic sperm injection: results of 112 cycles. *Fertil Steril* 1999; **72**:S2.
- Quaas AM, Melamed A, Chung K, Bendikson KA, Paulson RJ. Egg banking in the United States: current status of commercially available cryopreserved oocytes. *Fertil Steril* 2013; **99**:827–831.
- Rao GD, Chian RC, Son WS, Gilbert L, Tan SL. Fertility preservation in women undergoing cancer treatment. *Lancet* 2004; **363**:1829.
- Reddy J, Oktay K. Ovarian stimulation and fertility preservation with the use of aromatase inhibitors in women with breast cancer. *Fertil Steril* 2012; **98**:1363–1369.
- Rienzi L, Romano S, Albricci L, Maggiulli R, Capalbo A, Baroni E, Colamaria S, Sapienza F, Ubaldi F. Embryo development of fresh 'versus' vitrified metaphase II oocytes after ICSI: a prospective randomized sibling-oocyte study. *Hum Reprod* 2010; **25**:66–73.
- Rienzi L, Cobo A, Paffoni A, Scarduelli C, Capalbo A, Vajta G, Remohi J, Ragni G, Ubaldi FM. Consistent and predictable delivery rates after oocyte vitrification: an observational longitudinal cohort multicentric study. *Hum Reprod* 2012; **27**:1606–1612.
- Rudick B, Oppen N, Paulson R, Bendikson K, Chung K. The status of oocyte cryopreservation in the United States. *Fertil Steril* 2010; **94**:2642–2646.
- Saragusty J, Arav A. Current progress in oocyte and embryo cryopreservation by slow freezing and vitrification. *Reproduction* 2011; **141**:1–19.
- Sathananthan AH, Ng SC, Trounson AO, Bongso A, Ratnam SS, Ho J, Mok H, Lee MN. The effects of ultrarapid freezing on meiotic and mitotic spindles of mouse oocytes and embryos. *Gamete Res* 1988; **21**:385–401.
- Sauer MV, Kavac SM. Oocyte and embryo donation. 2006: reviewing two decades of innovation and controversy. *Reprod Biomed Online* 2006; **12**:153–162.
- Sauer MV, Paulson RJ, Lobo RA. A preliminary report on oocyte donation extending reproductive potential to women over 40. *N Engl J Med* 1990; **323**:1157–1160.
- Seki S, Mazur P. The dominance of warming rate over cooling rate in the survival of mouse oocytes subjected to a vitrification procedure. *Cryobiology* 2009; **59**:75–82.
- Smith GD, Serafini PC, Fioravanti J, Yaddi I, Coslovsky M, Hassun P, Alegritti JR, Motta EL. Prospective randomized comparison of human oocyte cryopreservation with slow-rate freezing or vitrification. *Fertil Steril* 2010; **94**:2088–2095.
- Solé M, Santaló J, Boada M, Clua E, Rodríguez I, Martínez F, Coroleu B, Barri PN, Veiga A. How does vitrification affect oocyte viability in oocyte donation cycles? A prospective study to compare outcomes achieved with fresh versus vitrified sibling oocytes. *Hum Reprod* 2013; **28**:2087–2092.
- Song W, Sun Y, Jin H, Xin Z, Su Y, Chian R. Clinical outcome of emergency egg vitrification for women when sperm extraction from the testicular tissues of the male partner is not successful. *Syst Biol Reprod Med* 2011; **57**:210–213.
- Sozou PD, Hartshorne GM. Time to pregnancy: a computational method. *PLoS ONE* 2012; **7**:e46544.
- Stephoe PC, Edwards RG. Birth after the reimplantation of a human embryo. *Lancet* 1978; **2**:366–366.
- Stoop D, Nekkebroeck J, Devroey P. A survey on the intentions and attitudes towards oocyte cryopreservation for non-medical reasons among women of reproductive age. *Hum Reprod* 2011; **26**:655–661.

- Stoop D, De Munck N, Jansen E, Platteau P, Van den Abbeel E, Verheyen G, Devroey P. Clinical validation of a closed vitrification system in an oocyte-donation programme. *Reprod Biomed Online* 2012;**24**:180–185.
- Stoop D, Cobo A, Silber S. Fertility preservation for age-related fertility decline. *Lancet* 2014;**384**:1311–1319.
- Stoop D, Maes E, Polyzos NP, Verheyen G, Tournaye H, Nekkebroeck J. Does oocyte banking for anticipated gamete exhaustion influence future relational and reproductive choices? A follow-up of bankers and non-bankers. *Hum Reprod* 2015;**30**:338–344.
- Tan SQ, Tan AWK, Lau MSK, Tan HH, Nadarajah S. Social oocyte freezing: a survey among Singaporean female medical students. *J Obstet Gynaecol Res* 2014;**40**:1345–1352.
- Toth TL, Baka SG, Veeck LL, Jones HW Jr, Muasher S, Lanzendorf SE. Fertilization and in vitro development of cryopreserved human prophase I oocytes. *Fertil Steril* 1994;**61**:891–894.
- Trokoudes KM, Pavlides C, Zhang X. Comparison outcome of fresh and vitrified donor oocytes in an egg-sharing donation program. *Fertil Steril* 2011;**95**:1996–2000.
- Tucker MJ, Morton PC, Wright G, Sweitzer CL, Massey JB. Clinical application of human egg cryopreservation. *Hum Reprod* 1998;**13**:3156–3159.
- Ubaldi F, Anniballo R, Romano S, Baroni E, Albricci L, Colamaria S, Capalbo A, Sapienza F, Vajta G, Rienzi L. Cumulative ongoing pregnancy rate achieved with oocyte vitrification and cleavage stage transfer without embryo selection in a standard infertility program. *Hum Reprod* 2010;**25**:1199–1205.
- Vajta G, Rienzi L, Ubaldi FM. Open versus closed systems for vitrification of human oocytes and embryos. *Reprod Biomed Online* 2015;**30**:325–333.
- Van Blerkom J, Davis PW. Cytogenetic, cellular, and developmental consequences of cryopreservation of immature and mature mouse and human oocytes. *Microsc ResTech* 1994;**27**:165–193.
- Van Loendersloot LL, Moolenaar LM, Mol BWJ, Repping S, Van der Veen F, Goddijn M. Expanding reproductive lifespan: a cost-effectiveness study on oocyte freezing. *Hum Reprod* 2011;**26**:3054–3060.
- Van Uem JFHM, Siebzehnrübl ER, Schuh B, Koch R, Trotnow S, Lang N. Birth after cryopreservation of unfertilized oocytes. *Lancet* 1987;**1**:752–753.
- Vincent C, Garnier V, Heyman Y, Renard JP. Solvent effects on cytoskeletal organization and in-vivo survival after freezing of rabbit oocytes. *J Reprod Fertil* 1989;**87**:809–820.
- Vincent C, Pickering SJ, Johnson MH. The hardening effect of dimethylsulphoxide on the mouse zona pellucida requires the presence of an oocyte and is associated with a reduction in the number of cortical granules present. *J Reprod Fertil* 1990;**89**:253–259.
- Winslow KL, Yang D, Blohm PL, Brown SE, Jossim P, Nguyen K. Oocyte cryopreservation—a three year follow up of sixteen births. *Fertil Steril* 2001;**76**:S120–S121.
- Wise J. UK lifts ban on frozen eggs. *BMJ* 2000;**320**:334.
- Ziadeh S, Yahaya A. Pregnancy outcome at age 40 and older. *Arch Gynecol Obstet* 2001;**265**:30–33.
